# Supplementary material
Source: publisher figshare collection journal article supplement (https://sage.figshare.com/ndownloader/files/17961611)
Supplement: Supplementary file 1 [file 17961611]

## Appendix

### Variables:

#### *Vote Choice*

- CCES Name: cc354b (pre-election wave early voters) & cc410a
- Question wording: cc354b: For which candidate for President of the United States did you vote? cc410a: For whom did you vote for President of the United States?
- Response options: Obama, Romney, other, I did not vote, I did not vote in this race, not sure, skipped not asked

#### *Explanatory Variables:*

##### Economic Position

- CCES Name: cc332d
- Question wording: Congress considered many important bills over the past two years. For each of the following tell us whether you support or oppose the legislation in principle. Tax Hike Prevention act. Would extend Bush-era tax cuts for all individuals, regardless of income. Would increase the budget deficit by an estimated \$405 billion.
- Response options: 1 = support; 2 = oppose; 8 = skipped; 9 = not asked

##### Health Care Position

- CCES Name: cc332G
- Question wording: Congress considered many important bills over the past two years. For each of the following tell us whether you support or oppose the legislation in principle. Repeal Affordable Care Act. Would Repeal the Affordable Care Act.
- Response options: 1 = support; 2 = oppose; 8 = skipped; 9 = not asked

##### Energy Position

- CCES Name: cc332h
- Question wording: Congress considered many important bills over the past two years. For each of the following tell us whether you support or oppose the legislation in principle. Keystone pipeline. A bill to approve the Keystone XL pipeline from Montana to Texas and provide for environmental protection and government oversight.
- Response options: 1 = support; 2 = oppose; 8 = skipped; 9 = not asked

##### Gun Control Position

- CCES Name: cc320
- Question wording: Question wording is not listed in the 2012 CCES Guide.
- Response options: 1 = more strict; 2 = less strict; 3 = kept as they are; 8 = skipped; 9 = not asked

##### Age

- Created by the author by subtracting birth year from 2012.

#### Female

- CCES Name: gender
- Question wording: Are you male or female?
- Response options: 1 = male; 2 = female

#### Minority

- CCES Name: race
- Question wording: What racial or ethnic group best describes you?
- Response options: 1 = white; 2 = Black; 3 = Hispanic; 4 = Asian; 5 = Native American; 6 = Mixed; 7 = Other; 8 = Middle Eastern

#### Education

- CCES Name: educ
- Question wording: What is the highest level of education you have completed?
- Response options: 1 = No HS; 2 = High School graduate; 3 = Some college; 4 = 2 – year; 5 = 4-year; 6 = Post-grad
